# Supplementary material for: AR mRNA stability is increased with AR-antagonist resistance via 3′UTR variants
Source: PubMed Central journal article supplement — Endocr Connect. 2019 Nov 28;9(1):9–19. doi: 10.1530/EC-19-0340 (PMC6933836; doi:10.1530/ec-19-0340), 2019-11-28
Supplement: supplementary_figure_1.pdf [file supplementary_figure_1.pdf]

Supplemental figure 1.

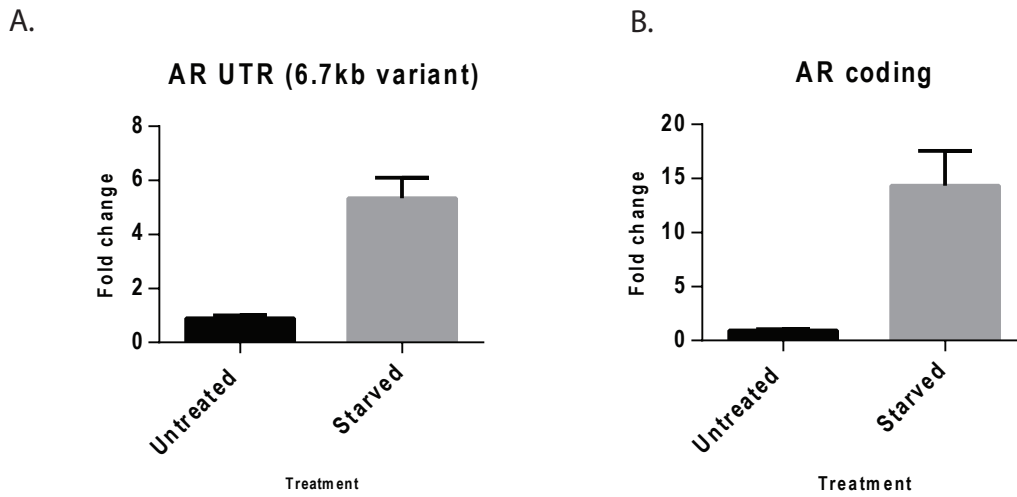

Q-PCR analysis of A, AR UTR and B, AR coding region in LNCaP cells grown in starvation medium for 72 hours. Data represents the mean and standard error from three independent replicates. Data is normalised to housekeeping genes GAPDH, RPL19 and b-actin.
