# Supplementary material for: AR mRNA stability is increased with AR-antagonist resistance via 3′UTR variants
Source: PubMed Central journal article supplement — Endocr Connect. 2019 Nov 28;9(1):9–19. doi: 10.1530/EC-19-0340 (PMC6933836; doi:10.1530/ec-19-0340), 2019-11-28
Supplement: supplementary_figure_2.pdf [file supplementary_figure_2.pdf]

Supplemental Figure 2.

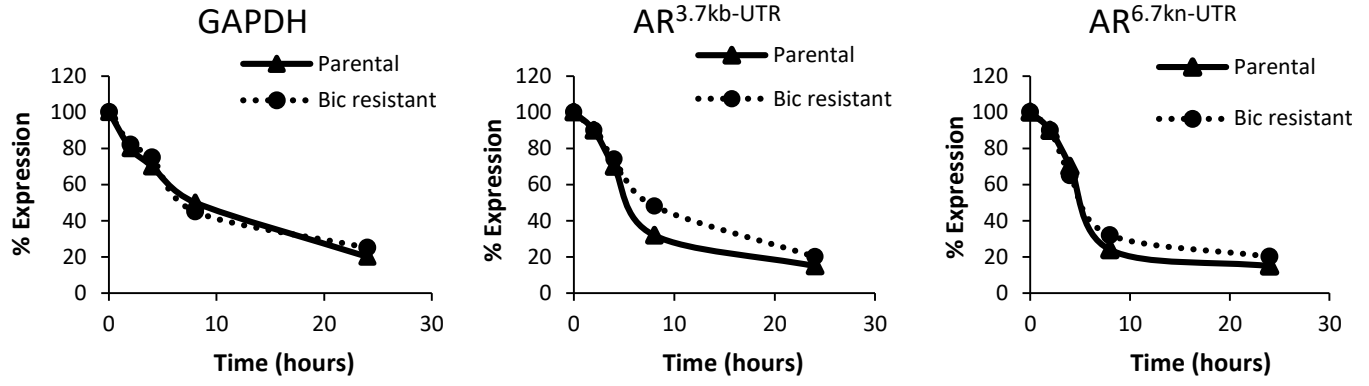

Q-PCR analysis of GAPDH, AR<sup>3.7kb-UTR</sup> and AR<sup>6.7kn-UTR</sup> from VCaP or VCaP<sup>BicR</sup> cells treated with actinomycin-D (1ug/ml) for 0-24hours. Data represents the mean and SE from three replicates. Data is normalised to the housekeeping genes GAPDH, RPL19, and  $\beta$ -actin, and then expressed as a % expression at time = 0.
