# Supplementary material for: AR mRNA stability is increased with AR-antagonist resistance via 3′UTR variants
Source: PubMed Central journal article supplement — Endocr Connect. 2019 Nov 28;9(1):9–19. doi: 10.1530/EC-19-0340 (PMC6933836; doi:10.1530/ec-19-0340), 2019-11-28
Supplement: supplementary_figure_3.pdf [file supplementary_figure_3.pdf]

### Supplemental figure 3.

A.

GSE71797

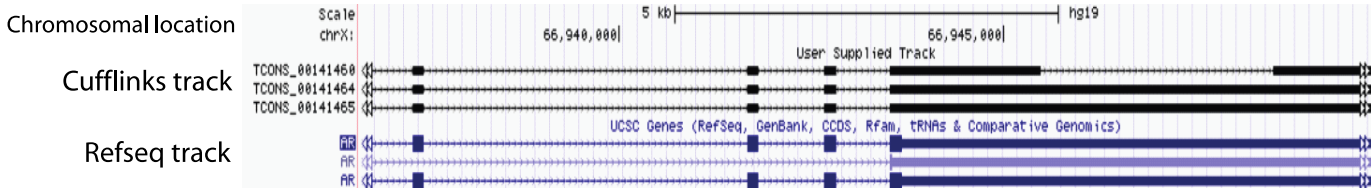

B.

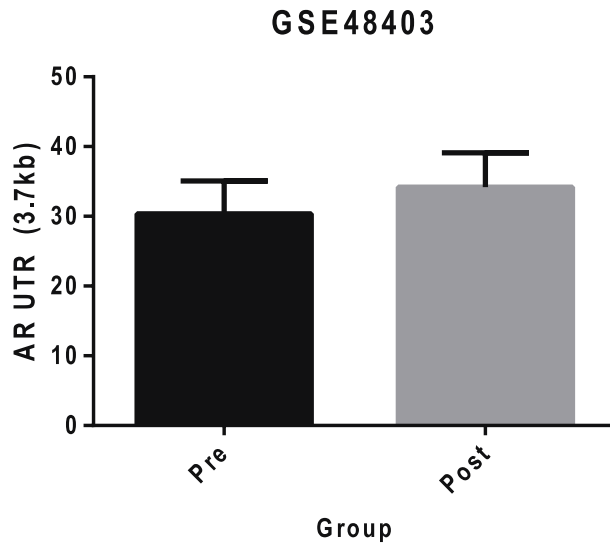

**A**, Screen shot of the Cuffmerge data analysis on RNA-seq data analysis from GEO data set GSE71797, using UCSC Galaxy software. Data shows that the AR 3'UTR variant is present at low levels in hTERT immortalized prostate basal epithelial cells.

**B**, Analysis of the number of reads (RPKM) of the AR UTR (3.7kb variant) region from the GEO data set GSE48403, using UCSC Galaxy software. Data represents 6 pair of patients either pre or post androgen deprivation therapy.
