# Supplementary material for: AR mRNA stability is increased with AR-antagonist resistance via 3′UTR variants
Source: PubMed Central journal article supplement — Endocr Connect. 2019 Nov 28;9(1):9–19. doi: 10.1530/EC-19-0340 (PMC6933836; doi:10.1530/ec-19-0340), 2019-11-28
Supplement: supplementary_figure_4.pdf [file supplementary_figure_4.pdf]

**Supplemental figure 4.**

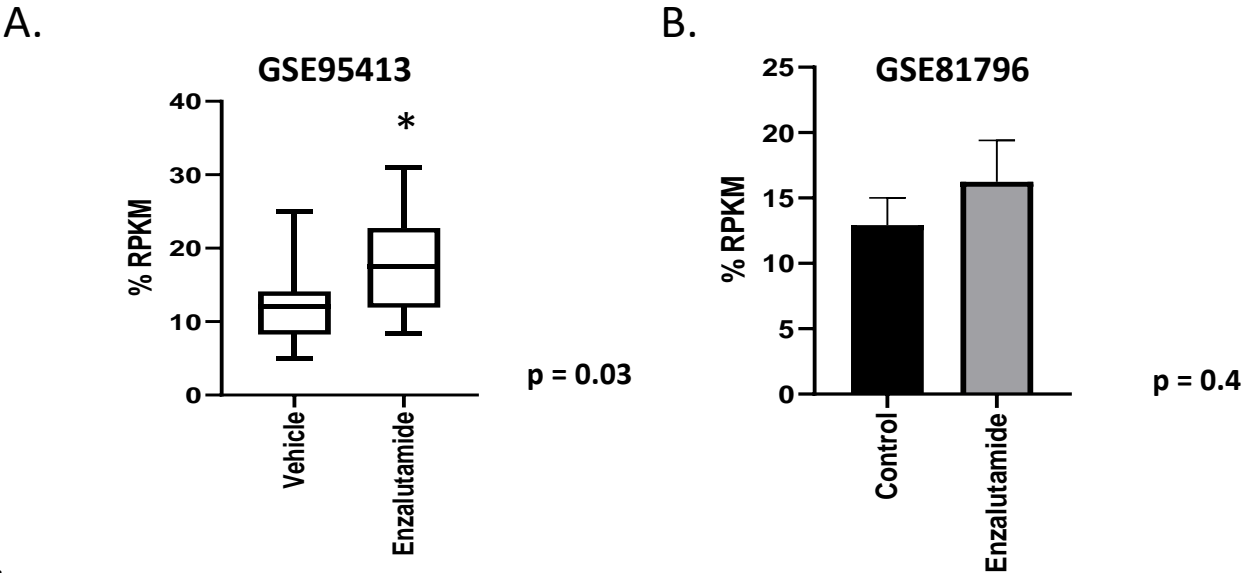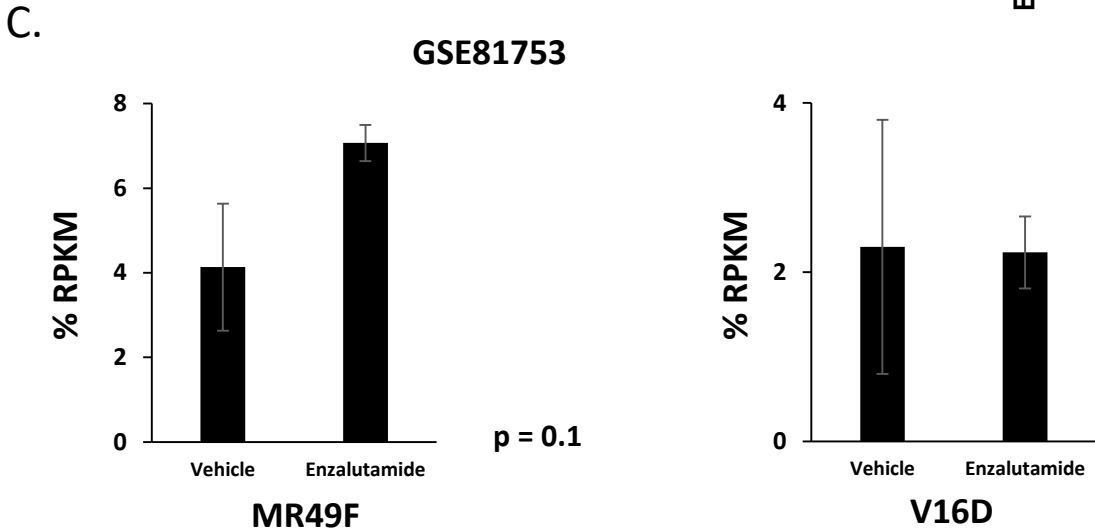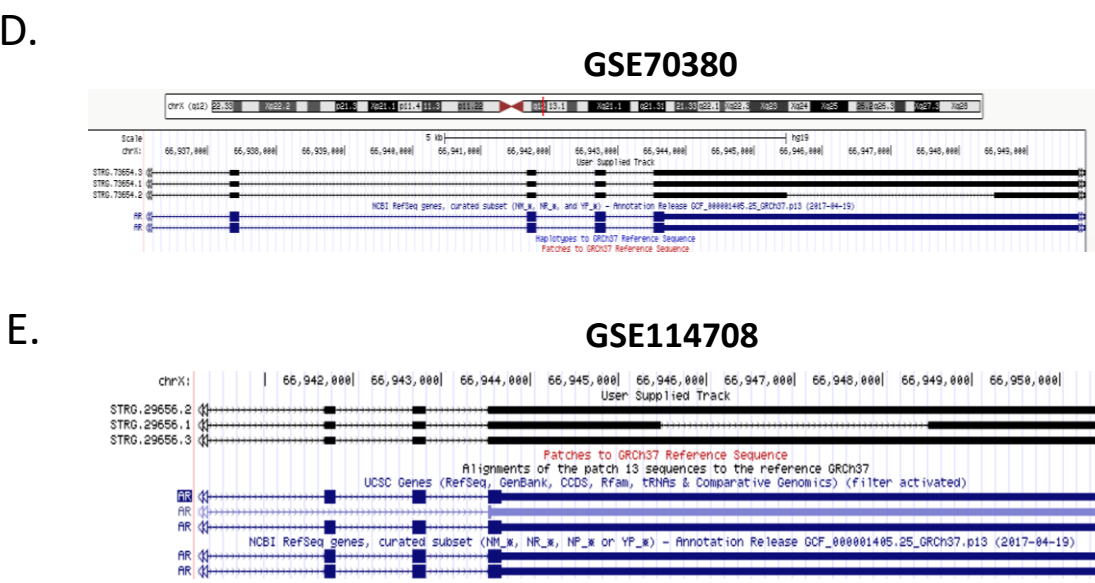

**A**, Boxplot showing the analysis of the AR  $\Delta$ UTR variant (in RPKM) from VCaP xenografts treated with enzalutamide. **B**, Graph showing analysis results of AR  $\Delta$ UTR (RPKM) from C4-2 cells treated with enzalutamide. **C**, Graph showing analysis results of AR  $\Delta$ UTR (RPKM) from the MR49F cell line – grown in castrated mice and enzalutamide treated. **D**, Screenshot from Cuffmerge data analysis from metastatic deposits of a patients with disease progression. **E**, Screenshot from Cuffmerge data analysis from LNCaP-abl cells.
