# Supplementary material for: AR mRNA stability is increased with AR-antagonist resistance via 3′UTR variants
Source: PubMed Central journal article supplement — Endocr Connect. 2019 Nov 28;9(1):9–19. doi: 10.1530/EC-19-0340 (PMC6933836; doi:10.1530/ec-19-0340), 2019-11-28
Supplement: supplementary_figure_5.pdf [file supplementary_figure_5.pdf]

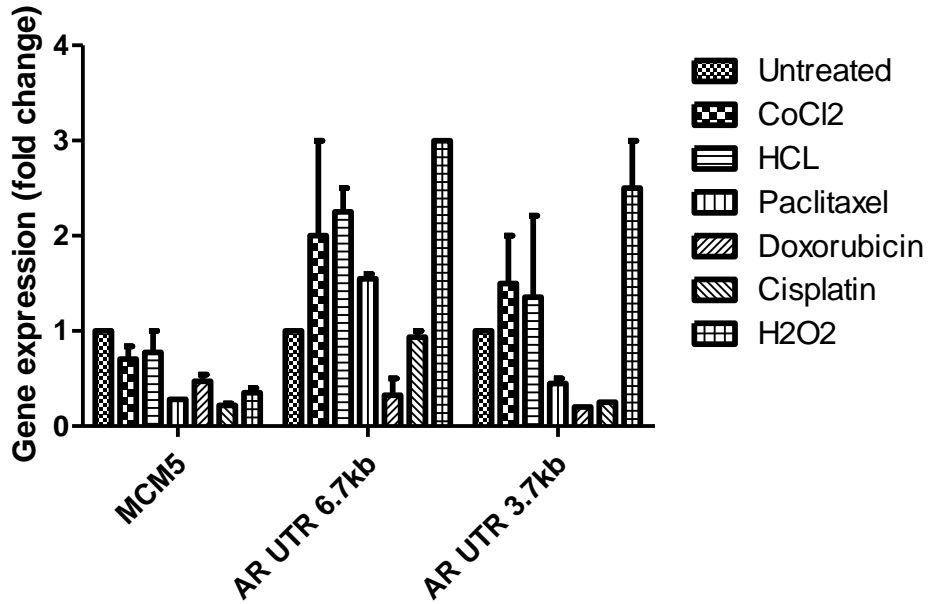

Q-PCR analysis of LNCaP cells treated with various conditions including hypoxia mimic  $\text{CoCl}_2$  ( $100\mu\text{M}$ ), HCl ( $10\text{mM}$ ), Paclitaxel ( $1\text{nM}$ ), Doxorubicin ( $1\mu\text{M}$ ), Cisplatin ( $3\mu\text{M}$ ),  $\text{H}_2\text{O}_2$  ( $0.1\text{mM}$ ) for 24 hours. Data is normalised to GAPDH,  $\beta$ -actin and RPL19.
