# Supplementary material for: AR mRNA stability is increased with AR-antagonist resistance via 3′UTR variants
Source: PubMed Central journal article supplement — Endocr Connect. 2019 Nov 28;9(1):9–19. doi: 10.1530/EC-19-0340 (PMC6933836; doi:10.1530/ec-19-0340), 2019-11-28
Supplement: supplementary_table_1.pdf [file supplementary_table_1.pdf]

**Supplemental Table 1.** Numbers and Gleason grades of prostate cancer patient serum samples.

| <b>Gleason Grade</b> | <b>Numbers of samples</b> |
|----------------------|---------------------------|
| 6                    | 28                        |
| 7                    | 54                        |
| 8                    | 17                        |
| 9                    | 19                        |
| 10                   | 6                         |
| Healthy volunteers   | 8                         |
