# Supplementary material for: AR mRNA stability is increased with AR-antagonist resistance via 3′UTR variants
Source: PubMed Central journal article supplement — Endocr Connect. 2019 Nov 28;9(1):9–19. doi: 10.1530/EC-19-0340 (PMC6933836; doi:10.1530/ec-19-0340), 2019-11-28
Supplement: supplementary_table_2.pdf [file supplementary_table_2.pdf]

## Supplemental table 2

| <b>Primer Name</b> | <b>ID or Sequence</b>            |
|--------------------|----------------------------------|
| b-actin            | Hs01060665_g1                    |
| RPL19              | Hs02338565_gH                    |
| GAPDH for          | 5'-AGCCACATCGCTCAGACAC-3'        |
| GAPDH rev          | 5'-GCCCAATACGACCAAATCC-3'        |
| PSA                | Hs02576345_m1                    |
| AR                 | Hs00171172_m1                    |
| A                  | 5'- AGCATTGGAAACCCTATTTTC-3'     |
| B                  | 5'-CAGCGGCAAAGCCTAAA-3'          |
| C                  | 5'-GAGAGGGGAACCTAAGAT-3'         |
| D                  | 5'-AACTGAAAAGAGTGGTGGATA-3'      |
| E                  | 5'-CTCTGCTCCTTCACAGGAC-3'        |
| F                  | 5'-GTTTTAACAAATTAACAACAATGATA-3' |
